# Supplementary material for: Assessing the Efficacy of Dietary Selenomethionine Supplementation in the Setting of Cardiac Ischemia/Reperfusion Injury
Source: MDPI journal article supplement (doi:10.3390/antiox8110546), 2019-11-13
Supplement: s1 [file s1]

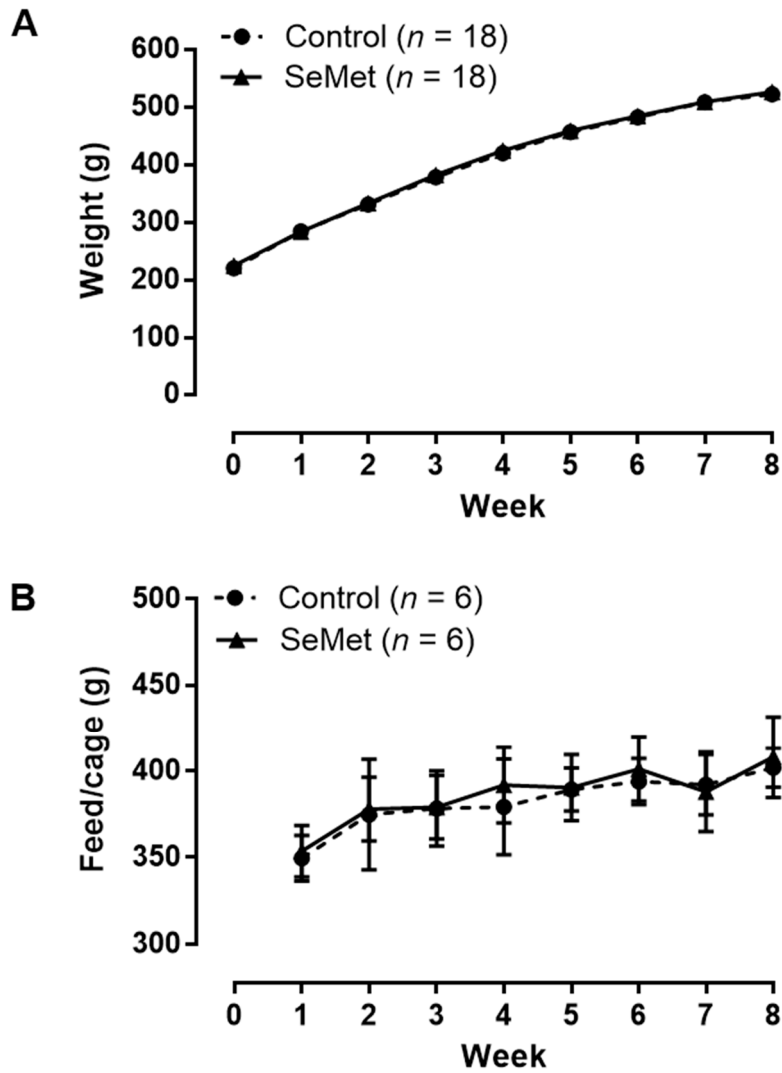

**Supplementary Figure 1. Body weight and food intake of rats on a SeMet-supplemented diet.** Male Wistar rats (100-125 g) were housed two rats per cage and randomly assigned into groups receiving either normal chow (control, dashed line) or normal chow supplemented with SeMet ( $2 \text{ mg kg}^{-1}$ , solid line) *ad libitum* for 8 weeks, with the (A) body weight of rats and (B) food consumption recorded at the end of each week. No significant difference between control and SeMet-supplemented group as determined by two-way ANOVA with Holm-Sidak post-hoc testing.
